# Supplementary material
Source: MDPI journal article supplement (https://www.mdpi.com/2073-4441/13/16/2270)
Supplement: s1 [file s1]

## Supporting Information

# Membrane Filtration Opportunities for the Treatment of Black Liquor in the Paper and Pulp Industry

Olenka Jibaja Valderrama <sup>1</sup>, Karina Listiarini Zedda <sup>2</sup> and Svetlozar Velizarov <sup>1,\*</sup>

<sup>1</sup> LAQV-REQUIMTE, Department of Chemistry, NOVA School of Science and Technology, Universidade Nova de Lisboa, P-2829-516 Caparica, Portugal

<sup>2</sup> Water Technologies and Solutions, D-06731 Bitterfeld-Wolfen, Germany; karina.zedda@suez.com

\* Correspondence: s.velizarov@fct.unl.pt; Tel.: +351-212948550

### 1. Equations:

The permeate flux,  $J_v$ , was calculated using Equation S1.

$$J_v = \frac{V}{A_m t} \quad (S1)$$

Where  $V$  is the volume of permeate,  $A_m$  is the membrane area and  $t$  is the filtration time.

The rejection of salts based on conductivity is defines as:

$$R(\%) = \left(1 - \frac{\text{Permeate conductivity}}{\text{Feed conductivity}}\right) \times 100 \quad (S2)$$

To calculate the transmembrane pressure (TMP), Equation S3 was considered:

$$TMP = \Delta p - \Delta \pi \quad (S3)$$

Where  $\Delta p$  is the operating pressure of the system and  $\Delta \pi$  is the osmotic pressure difference, which was calculated using Equation S4:

$$\Delta \pi = \pi_{feed} - \pi_{permeate} \quad (S4)$$

The osmotic pressure of a solution with  $n$  components  $i$  used was estimated by the Van't Hoff Equation S5:

$$\pi = \sum_{i=1}^n C_i \times R \times T \quad (S5)$$

Where  $C_i$  is the molar concentration of the component  $i$  in the solution (mol L<sup>-1</sup>),  $R$  is the ideal gas constant and  $T$  is the temperature (K).

The amount of OH<sup>-</sup> in the feed and permeate samples was calculated using Equations S6 and S7.

$$pH = 14 - pOH \quad (S6)$$

$$pOH = \log[OH^-] \quad (S7)$$

In Equation S8,  $W_{feed}$  is the energy required in the feed pump per m<sup>3</sup> of feed,  $TMP$  is the transmembrane pressure and  $\eta$  is the pump efficiency. In Equation S9,  $W_{recirc}$  is the energy required in the recirculation pump,  $\Delta P_f$  is the average frictional pressure drop,  $CFV$  is the crossflow velocity,  $D$  and  $L$  are the diameter and length of the flow channel in the membrane and  $J_{av}$  is the average flux.

$$W_{feed} = \frac{TMP \times Q_{feed}}{\eta} \quad (S8)$$

$$W_{recirc} = \left( \frac{\Delta P_f \times CFV \times D}{4\eta \times J_{av} \times L} \right) \quad (S9)$$

### 1.1. Calculation of osmotic pressures and transmembrane pressures:

The osmotic pressure in the feed ( $\pi_{feed}$ ) was calculated considering that the fixed temperature was 40°C. The total molar concentration was calculated from the valences and molar concentrations of each of the components of the feed ( $\text{Na}^+$ ,  $\text{Mg}^{2+}$ ,  $\text{OH}^-$ ,  $\text{SO}_4^{2-}$  and  $\text{CO}_3^{2-}$ ), giving a final value of 0.65 mol L<sup>-1</sup>. As a result, the osmotic pressure was 16.91 bars:

$$\pi_{feed} = \sum_{i=1}^n 0.65 \times 0.0821 \times 313.15 = 16.91 \text{ bar}$$

Considering that the temperature of the permeate was 22.7 °C in average, the osmotic pressures of the permeate side for Membranes A ( $\pi_{perm-A}$ ), B ( $\pi_{perm-B}$ ) and C ( $\pi_{perm-C}$ ) were calculated using the compositions of the permeates obtained with each membrane. Finally, the transmembrane pressures were determined as the difference between the operating pressure (in this case, 35 bars) and the osmotic pressure difference (rounded to the decimal place) in each case. The results are summarized in Table S2.

Table S2. Transmembrane pressures (bar)

|            | Operating pressure (ΔP) | Osmotic pressure of the feed ( $\pi_{feed}$ ) | Osmotic pressure of the permeate ( $\pi_{perm}$ ) | Osmotic pressure difference (Δπ) | Transmembrane pressure (TMP) |
|------------|-------------------------|-----------------------------------------------|---------------------------------------------------|----------------------------------|------------------------------|
| Membrane A |                         |                                               | 3.42                                              | 13.5                             | 21.5                         |
| Membrane B | 35.0                    | 16.91                                         | 1.55                                              | 15.4                             | 19.6                         |
| Membrane C |                         |                                               | 4.58                                              | 12.3                             | 22.7                         |

## 2. Life cycle assessment:

### 2.1. Definition of the goal and scope

This study was complimented by a preliminary life cycle assessment to compare the environmental impact of two treatment options for black liquor: incineration through recovery boilers and a UF/NF membrane system. The data obtained could provide relevant starting information for investors, who are considering a possible implementation of one of the options. For both treatment processes, the system boundaries were defined around the process operation phase Figure S1. The construction and dismantling phases were not considered in this study.

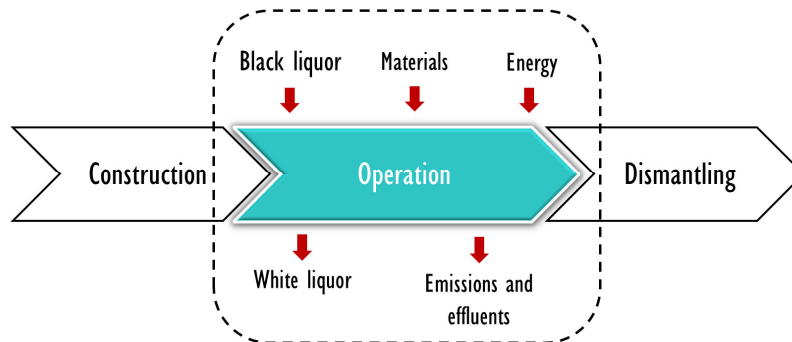

Figure S1. Goal and scope of the LCA study

Both systems had the goal to treat black liquor and recover the white liquor, so the functional unit in both cases was 1 m<sup>3</sup> of treated black liquor with the required characteristics to be reused in the cooking process. All the inputs and outputs of the systems were related to this functional unit.

## 2.2. Inventory assessment

As part of the inventory assessment, environmentally relevant data was collected in order to quantify the inputs and outputs of the two alternatives to be evaluated. For the recovery of white liquor from black liquor using recovery boilers, the main inputs of the system were the energy consumed and the chemicals. For the recovery of white liquor from black liquor using membrane technologies, the main input of the system was the energy consumed. All the material outputs were expressed as kg m<sup>-3</sup> of black liquor or kg TJ<sup>-1</sup> of energy generated. The energy inputs were expressed as kWh m<sup>-3</sup> of black liquor. In Scenario 1, the chemical recovery required 13 kWh m<sup>-3</sup> of black liquor to operate [1]. In Scenario 2, the energy consumption was 0.15 kWh m<sup>-3</sup> for UF and 1.61 kWh m<sup>-3</sup> for NF.

Table S3 shows the outputs using the conventional process based on the emission factors. For the membrane process. Given the small amount of cleaning solutions required for the operation of the membrane process, they were not considered in the LCA.

**Table S3.** Outputs using the conventional process [2]

| Unit process                                                    | Output                         | Amount                                          |
|-----------------------------------------------------------------|--------------------------------|-------------------------------------------------|
| Recovery boiler, lime combustion                                | CO <sub>2</sub>                | 64.40 kg m <sup>-3</sup> of black liquor        |
| Energy generation                                               | CO <sub>2</sub>                | 110,000 kg TJ <sup>-1</sup> of energy generated |
| Recovery boiler, smelt tank, lime combustion, energy generation | Particulates                   | 24 kg m <sup>-3</sup> of black liquor           |
| Evaporator, recovery boiler, smelt tank                         | TRS (reduced sulfur compounds) | 0.13 kg m <sup>-3</sup> of black liquor         |
| Recovery boiler, smelt tank, lime combustion                    | SO <sub>2</sub>                | 7.80 kg m <sup>-3</sup> of black liquor         |
| Recovery boiler, smelt tank, lime combustion                    | NO <sub>x</sub>                | 13.70 kg m <sup>-3</sup> of black liquor        |
| Energy generation                                               | NO <sub>x</sub>                | 100.00 kg TJ <sup>-1</sup> of energy generated  |
| Recovery boiler                                                 | CO                             | 55.00 kg m <sup>-3</sup> of black liquor        |
| Energy generation                                               | CO                             | 4,000 kg TJ <sup>-1</sup> of energy generated   |
| Evaporation, recovery boiler                                    | NMVOCS                         | 3.82 kg m <sup>-3</sup> of black liquor         |
| Energy generation                                               | NMVOCS                         | 50 kg TJ <sup>-1</sup> of energy generated      |
| Energy generation                                               | CH <sub>4</sub>                | 30 kg TJ <sup>-1</sup> of energy generated      |
| Energy generation                                               | N <sub>2</sub> O               | 4 kg TJ <sup>-1</sup> of energy generated       |

## 2.3. Calculation of emissions and environmental impacts

Five environmental categories were considered: global warming, acidification, eutrophication, smog and human toxicity. The emissions related to each of these categories are summarized in Table S4.

**Table S4.** Emissions in each environmental category

| Environmental category | Emissions                                                                           |
|------------------------|-------------------------------------------------------------------------------------|
| Global warming         | CO <sub>2</sub> , CH <sub>4</sub> and NO <sub>x</sub>                               |
| Acidification          | SO <sub>2</sub> and NO <sub>x</sub>                                                 |
| Eutrophication         | NO <sub>3</sub> <sup>-</sup> , PO <sub>4</sub> <sup>3-</sup> , total N and total P. |
| Smog                   | NMVOCS, CO, CH <sub>4</sub> , NO <sub>x</sub>                                       |
| Human toxicity         | Particulates, AOX, TRS, SO <sub>2</sub> and NO <sub>x</sub>                         |

The total emissions are calculated using Equation S10:

$$\text{Total of Emissions} = \text{Activity} \times \text{Emission factor} \quad (\text{S10})$$

In the scope of this study, the activities in the black liquor treatment that contribute to the emissions included the chemical recovery unit and the energy generation unit. These activities were related to the production capacity of the plant. For each of the 2 options in evaluation, the capacity of the system was considered as stated in Table S5.

**Table S5.** Activity data in the chemical recovery unit for the calculation of the emissions

| Activity             | Scenario 1                                  | Scenario 2                                  |
|----------------------|---------------------------------------------|---------------------------------------------|
| Conventional process | 150 m <sup>3</sup> of black liquor per hour | 135 m <sup>3</sup> of black liquor per hour |
| Membrane process     | 0 m <sup>3</sup> of black liquor per hour   | 15 m <sup>3</sup> of black liquor per hour  |
| TOTAL                | 150 m <sup>3</sup> of black liquor per hour | 150 m <sup>3</sup> of black liquor per hour |

For the calculation of the amount of energy generated using the conventional process, it was assumed that 1,500 tons of black liquor solids could generate 30 MW of energy and that 10 tons of black liquor had 1.50 of dry solids [3]. The total energy generated would be  $13.20 \times 10^{-3}$  TJ h<sup>-1</sup> in Scenario 1 and  $11.88 \times 10^{-3}$  TJ h<sup>-1</sup> in Scenario 2.

The emission factors for each process under evaluation are detailed in Tables S6 and S7. Table S6 refers to the processes involved in the chemical recovery and Table S7 to the energy generation. Since this evaluation took into account the implementation of the proposal in Sweden, the emissions of energy generation correspond to the use of biomass as it is one of the main energy sources in Sweden.

**Table S6.** Emission factors in the chemical recovery unit from Kraft pulp production

| Process         | Output          | Amount (kg m <sup>-3</sup> of black liquor) | Source |
|-----------------|-----------------|---------------------------------------------|--------|
| Evaporation     | NMVOCs          | 0.520                                       | [4]    |
|                 | TRS             | 0.010                                       | [5]    |
| Recovery boiler | CO <sub>2</sub> | 61.800                                      | [6]    |
|                 | SO <sub>2</sub> | 2.060                                       | [5]    |
|                 | NO <sub>x</sub> | 10.610                                      | [7]    |
|                 | CO              | 56.650                                      | [7]    |
|                 | NMVOCs          | 3.420                                       | [7]    |
|                 | TRS             | 0.030                                       | [5]    |
|                 | Particulates    | 12.360                                      | [5]    |
| Smelt tank      | SO <sub>2</sub> | 0.310                                       | [5]    |
|                 | NO <sub>x</sub> | 0.100                                       | [5]    |
|                 | TRS             | 0.090                                       | [5]    |
|                 | Particulates    | 1.030                                       | [5]    |
| Lime combustion | CO <sub>2</sub> | 4.530                                       | [8]    |
|                 | SO <sub>2</sub> | 5.665                                       | [5]    |
|                 | NO <sub>x</sub> | 3.399                                       | [5]    |
|                 | Particulates    | 1.030                                       | [9]    |

**Table S7.** Emission factors in the energy generation unit from Kraft pulp production

| Process                | Output           | Amount | Units                | Source |
|------------------------|------------------|--------|----------------------|--------|
| Energy generation unit | CO <sub>2</sub>  | 110    | ton TJ <sup>-1</sup> | [9]    |
|                        | CH <sub>4</sub>  | 0.030  | ton TJ <sup>-1</sup> | [9]    |
|                        | N <sub>2</sub> O | 0.004  | ton TJ <sup>-1</sup> | [9]    |
|                        | NMVOC            | 0.050  | ton TJ <sup>-1</sup> | [9]    |
|                        | CO               | 4      | ton TJ <sup>-1</sup> | [9]    |

|                 |        |                                    |     |
|-----------------|--------|------------------------------------|-----|
| NO <sub>x</sub> | 0.100  | ton TJ <sup>-1</sup>               | [9] |
| Particulates    | 10.300 | kg m <sup>-3</sup> of black liquor | [4] |

The next step was the calculation of the environmental impacts, which was determined using Equation S11:

$$Impact = Total\ emissions \times Classification\ factor \quad (S11)$$

In the classification, the inventory inputs and outputs were assigned to the selected environmental categories. The classification factors for the 5 environmental categories evaluated in this study are presented in Table S8.

**Table S8.** Classification factors used for emissions for 1 kg of pollutants

| Environmental category | Compound         | Classification factor                                   | Reference |
|------------------------|------------------|---------------------------------------------------------|-----------|
| Global warming         | CO <sub>2</sub>  | 1 CO <sub>2</sub> -eq                                   | [9]       |
|                        | CH <sub>4</sub>  | 21 CO <sub>2</sub> -eq                                  |           |
|                        | N <sub>2</sub> O | 310 CO <sub>2</sub> -eq                                 |           |
| Acidification          | SO <sub>2</sub>  | 1 SO <sub>2</sub> -eq                                   | [10]      |
|                        | NO <sub>x</sub>  | 0.710 SO <sub>2</sub> -eq                               |           |
| Eutrophication         | NO <sub>x</sub>  | 0.130 PO <sub>4</sub> -eq                               | [10]      |
| Smog                   | NMPOC            | 0.416 ethylene-eq                                       | [10]      |
|                        | CO               | 0.027 ethylene-eq                                       |           |
|                        | CH <sub>4</sub>  | 0.006 ethylene-eq                                       |           |
|                        | NO <sub>x</sub>  | 0.028 ethylene-eq                                       |           |
| Human toxicity         | TRS              | 0.220 C <sub>6</sub> H <sub>4</sub> Cl <sub>2</sub> -eq | [10]      |
|                        | SO <sub>2</sub>  | 0.096 C <sub>6</sub> H <sub>4</sub> Cl <sub>2</sub> -eq |           |
|                        | NO <sub>x</sub>  | 1.200 C <sub>6</sub> H <sub>4</sub> Cl <sub>2</sub> -eq |           |
|                        | Particulates     | 0.820 C <sub>6</sub> H <sub>4</sub> Cl <sub>2</sub> -eq |           |

In this part of the study, the information in the inventory table was related to the impact categories and indicators in order to analyze the environmental impacts of each of the scenarios for the recovery of white liquor. The environmental categories considered were global warming, acidification, eutrophication, smog formation and human toxicity.

#### 2.4. Impact assessment results

As illustrated in Figure S2, the treatment process that had the higher contribution in the different impact categories analyzed for the two scenarios was the recovery boiler. After an individual analysis of each environmental category, a comparison between the two options was made. A summary of the total environmental impacts is shown in Table S9.

**Table S9.** Comparison between the impact assessment results for Scenario 1 and Scenario 2

| Impact category | Unit                                                                  | Scenario 1 | Scenario 2 | Decrease |
|-----------------|-----------------------------------------------------------------------|------------|------------|----------|
| Global warming  | ton CO <sub>2</sub> -eq h <sup>-1</sup>                               | 10,735.13  | 9,665.76   | 9.96%    |
| Acidification   | ton SO <sub>2</sub> -eq h <sup>-1</sup>                               | 2,708.42   | 2,437.58   | 10.00%   |
| Eutrophication  | ton ethylene-eq h <sup>-1</sup>                                       | 275.26     | 247.73     | 10.00%   |
| Smog            | ton PO <sub>4</sub> -eq h <sup>-1</sup>                               | 535.14     | 481.72     | 9.98%    |
| Human toxicity  | ton C <sub>6</sub> H <sub>4</sub> Cl <sub>2</sub> -eq h <sup>-1</sup> | 5,701.49   | 5,258.11   | 7.78%    |

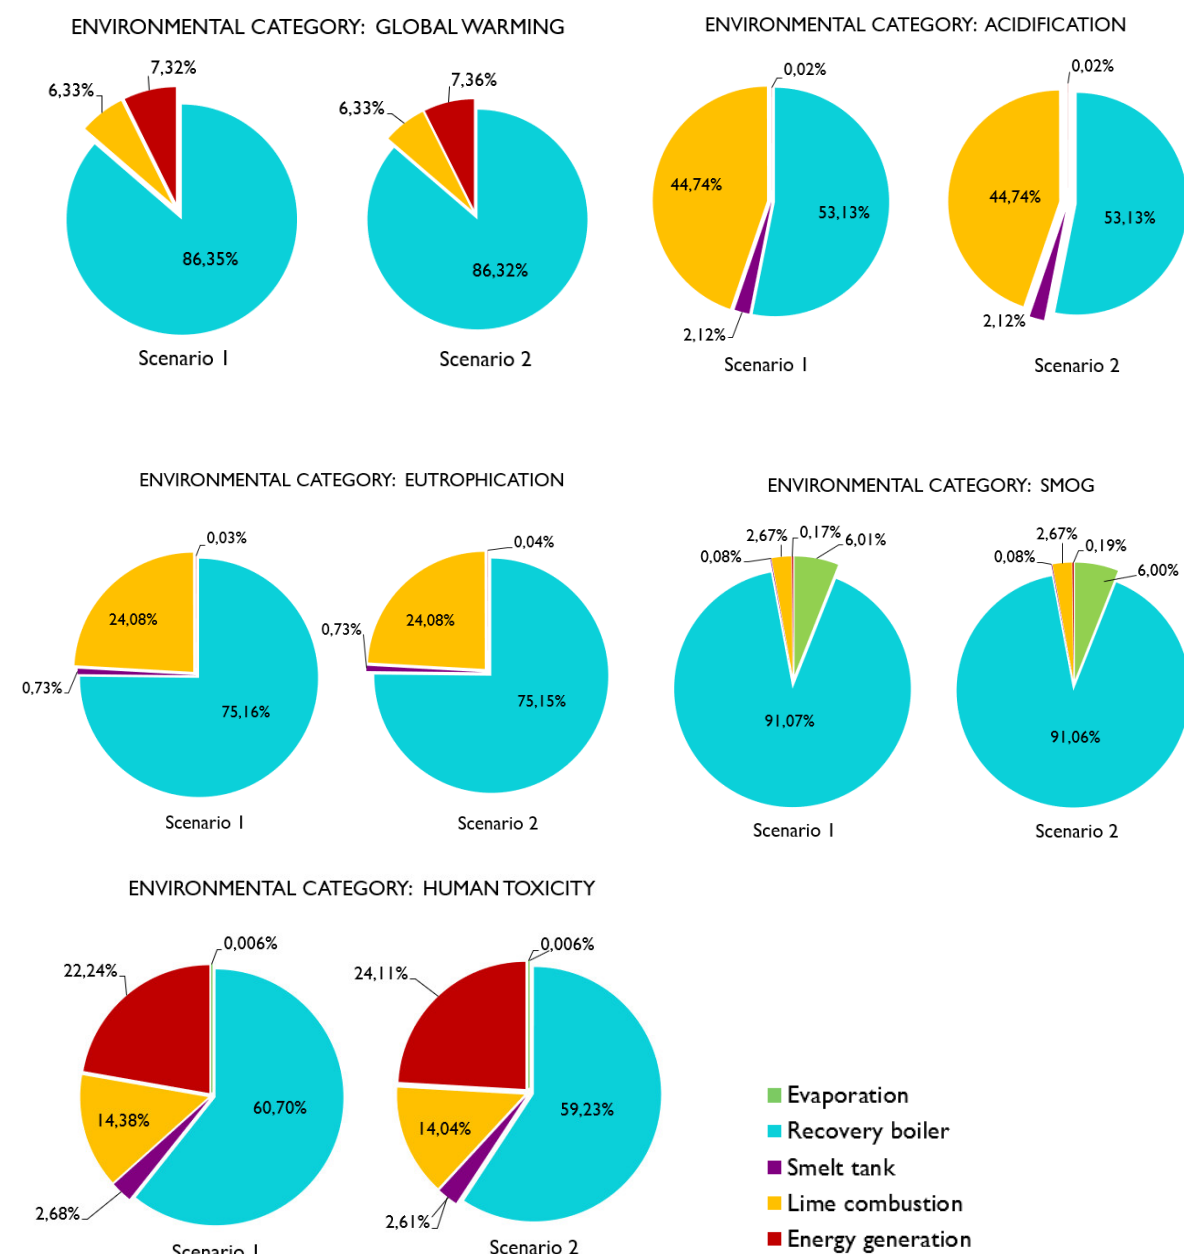

**Figure S2.** Impact assessment results

#### Abbreviations:

(Abbreviations are listed alphabetically)

|      |                                 |
|------|---------------------------------|
| AOX  | Adsorbable Organic Halides      |
| EDTA | Ethylenediaminetetraacetic acid |
| GWP  | Global Warming Potential        |
| LCA  | Life cycle assessment           |

|       |                                        |
|-------|----------------------------------------|
| NF    | Nanofiltration                         |
| NMVOC | Non-methane volatile organic compounds |
| TMP   | Transmembrane pressure                 |
| TRS   | Total Reduced Sulphur                  |
| VOC   | Volatile organic compounds             |

## References:

1. (CAR/PL), C.d.A.R.p.I.P.L. *Prevención de la contaminación en el sector papelero*; Spain, 2005.
2. Loutfi, H.; Blackwell, B.; Uloth, V. Lignin recovery from kraft black liquor: Preliminary process design. *Tappi Journal* **1991**, 74, 203-210.
3. Wallberg, O.; Jönsson, A.-S. Separation of lignin in kraft cooking liquor from a continuous digester by ultrafiltration at temperatures above 100°C. *Desalination* **2006**, 195, 187-200.
4. JRC, D.-G. Integrated pollution prevention and control (ippc) reference document on the application of best available techniques to industrial cooling systems. **2001**.
5. Bordado, J.C.M.; Gomes, J.F.P. Emission and odour control in kraft pulp mills. *J Clean Prod* **2003**, 11, 797-801.
6. Institute, T.E. *Industrial environmental performance indicators*; Thailand, 1999.
7. CORINAIR. *Atmospheric emission inventory guidebook*; European Environment Agency: Copenhagen, Denmark, 2000.
8. Association, T.P.a.P.I. *Application of the production performance indicators in accordance with global reporting initiative (gri) to thai pulp and paper industries*; Bangkok, Thailand, 2002.
9. Poyry, J. *Technical and economical evaluation of water pollution control in pulp mill*; Helsinki, Finland, 1992.
10. Jawjit, W. An environmental systems analysis of the kraft pulp industry in thailand. **2006**.
